# Supplementary material for: Chemodiversity and Anti-Leukemia Effect of Metabolites from Penicillium setosum CMLD 18
Source: MDPI journal article supplement (doi:10.3390/metabo13010023), 2022-12-23
Supplement: s1 [file s1]

## Supplementary material

### CHEMODIVERSITY AND ANTI-LEUKEMIA EFFECT OF METABOLITES FROM *Penicillium setosum*

Ana Calheiros de Carvalho <sup>1</sup>, Cauê Santos Lima <sup>2</sup>, Heron Fernandes Vieira Torquato <sup>3</sup>, André Tarsis Domiciano <sup>2</sup>, Sebastião da Cruz Silva <sup>4</sup>, Lucas Magalhães de Abreu <sup>5</sup>, Miriam Uemi <sup>6</sup>, Edgar Julian Paredes-Gamero <sup>7</sup>, Paulo Cezar Vieira <sup>8</sup>, Thiago André Moura Veiga <sup>6,\*</sup> and Livia Soman de Medeiros <sup>6,\*</sup>

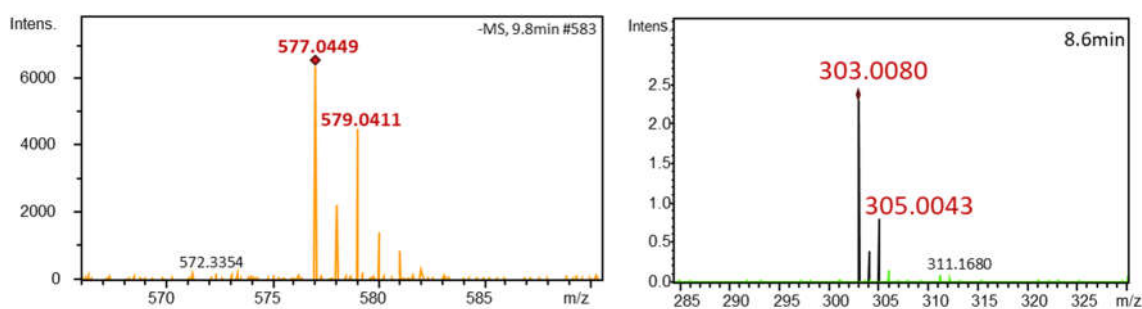

**Figure S1:** Mass spectrum (ESI-) of some peaks found in the base peak chromatogram obtained from the methanolic extracts of *Penicillium setosum* CMLD 18 (9.8 min.; 8.6 min.).

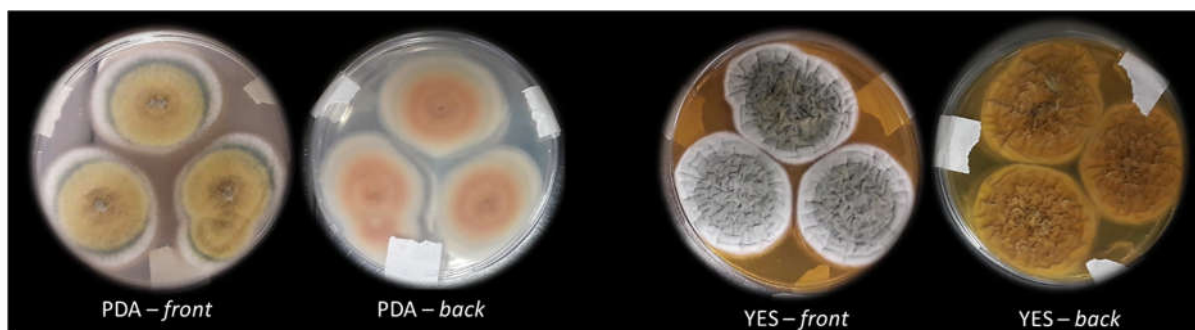

**Figure S2.** Macroscopic pictures of *Penicillium setosum* CMLD 18 in PDA and YES growth medium respectively.

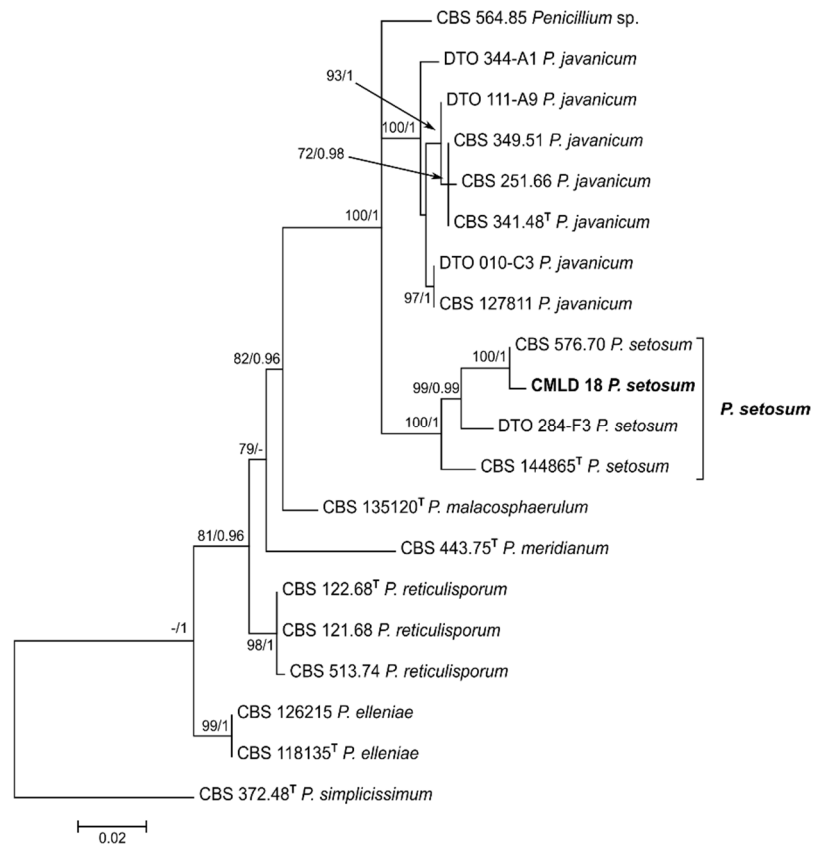

**Figure S3:** Bayesian Inference and Maximum Likelihood phylogenetic analyses of partial beta tubulin gene sequences placed the strain CMLD 18 inside a well-supported clade composed of the ex-type and other reference strains of *Penicillium setosum*. Morphological characterization of CMLD 18 using standard media and conditions used in *Penicillium* taxonomy (Visagie et al. 2014) supported the identification (data not shown).

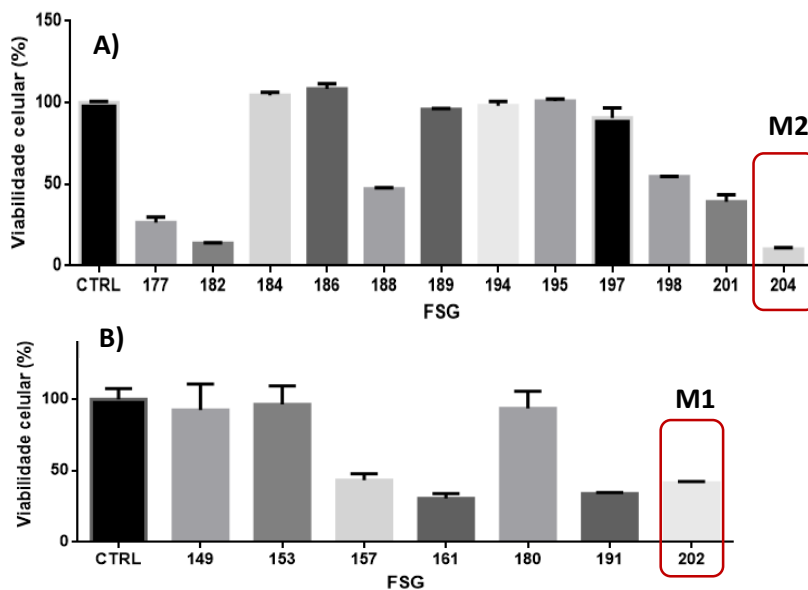

**Figure S4:** Cell viability of the methanolic fraction obtained from *P. setosum* cultivated in rice (A, M2) and hominy (B, M1) (highlighted in red) against the cell line KG-1 and Kasumi-1, respectively.

Ana  
HR1-LC

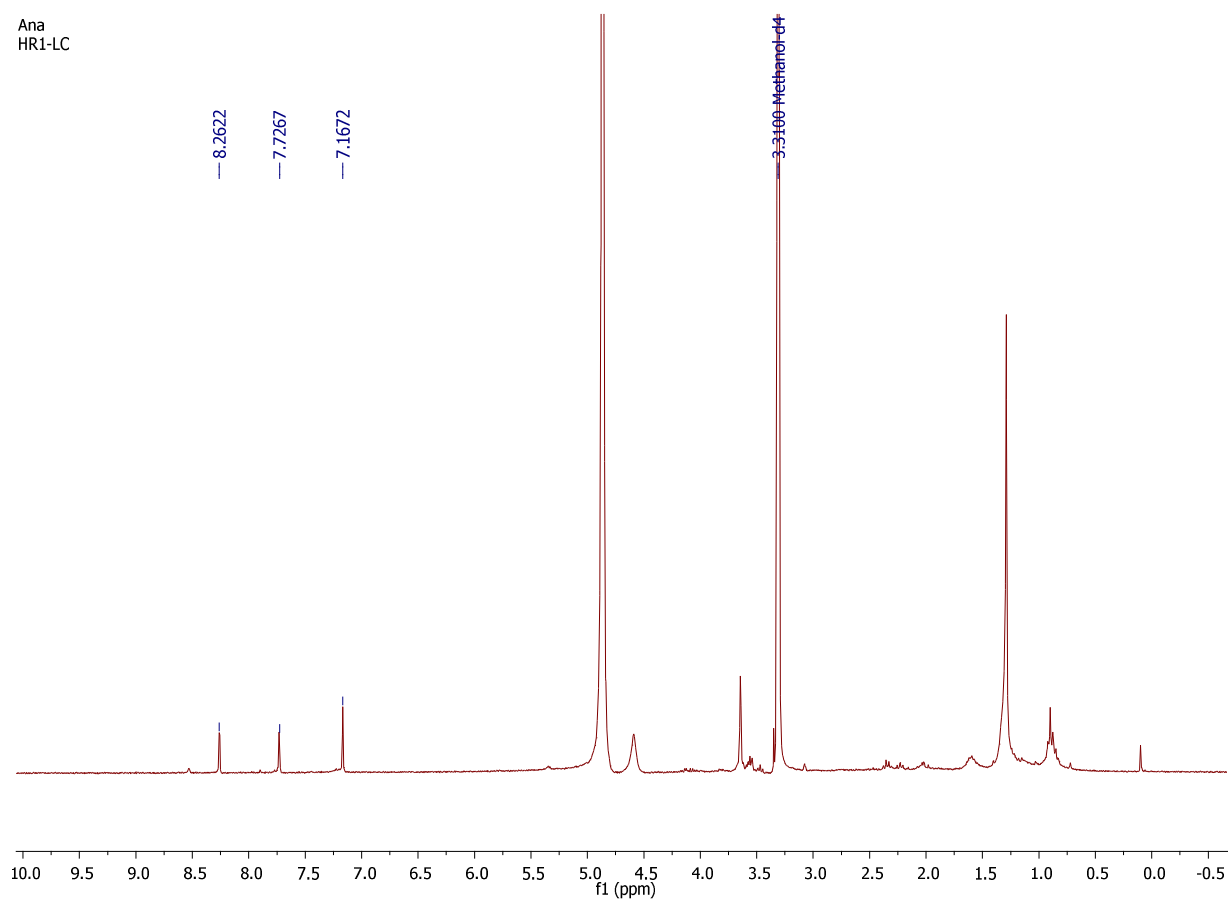

**Figure S5:** <sup>1</sup>H NMR spectrum of 2-chloroemodic acid (2) (300 MHz, methanol-*d*<sub>4</sub>).

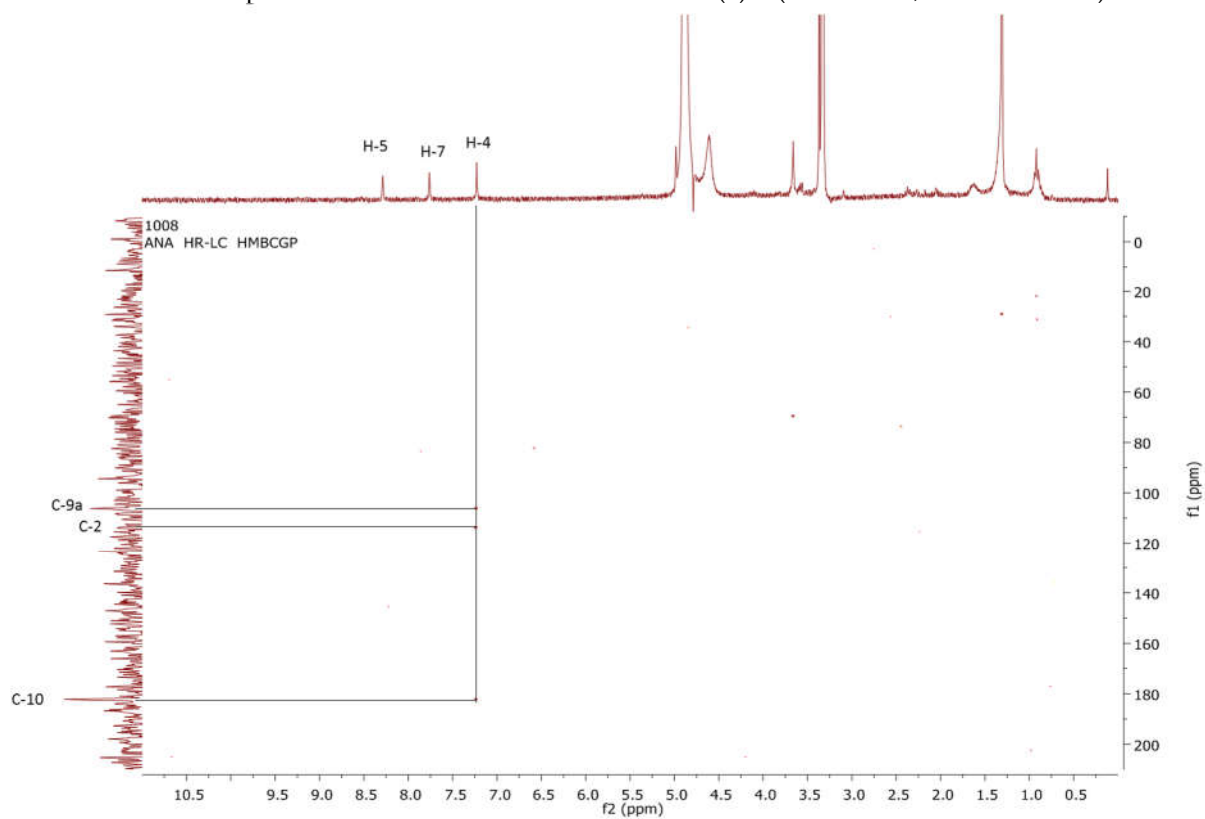

**Figure S6:** HMBC spectrum of 2-chloroemodic acid (2) (300 MHz, methanol-*d*<sub>4</sub>).

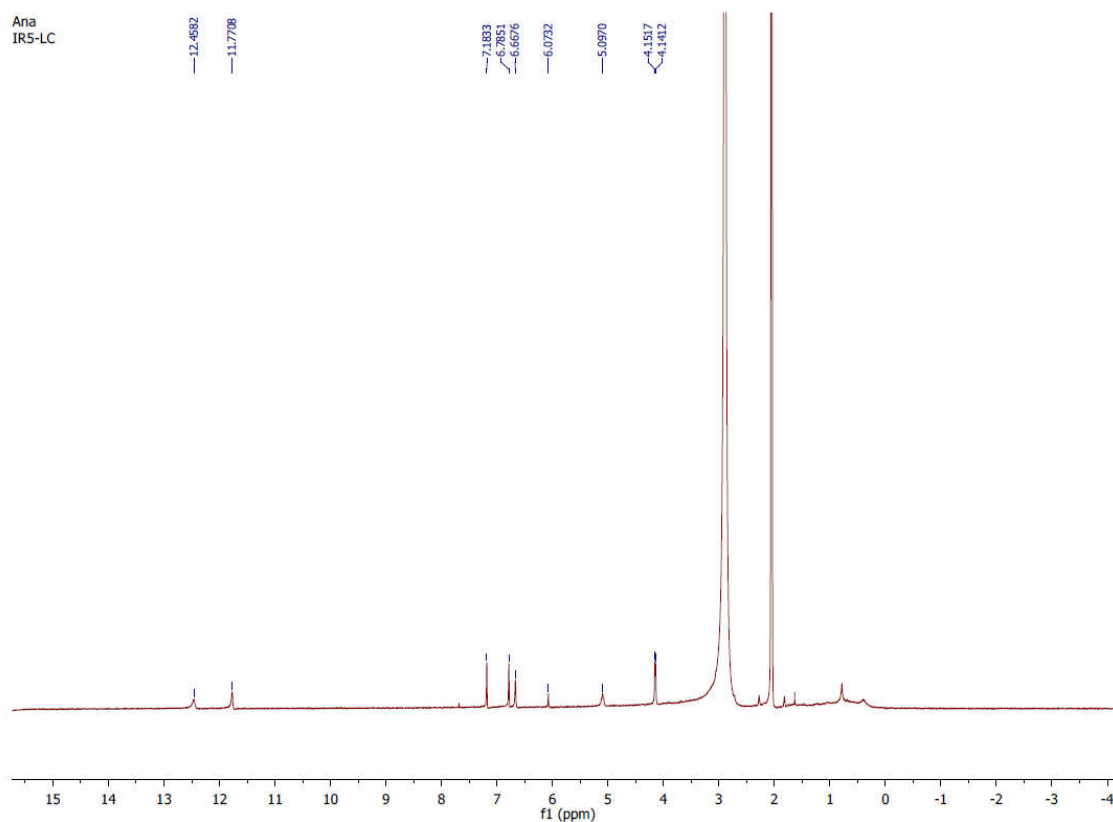

**Figure S7:**  $^1\text{H}$  NMR spectrum of 2-chloro-1,3,8-trihydroxy-6-(hydroxymethyl)-anthraquinone (7) (300 MHz, acetone- $\text{d}_6$ ).

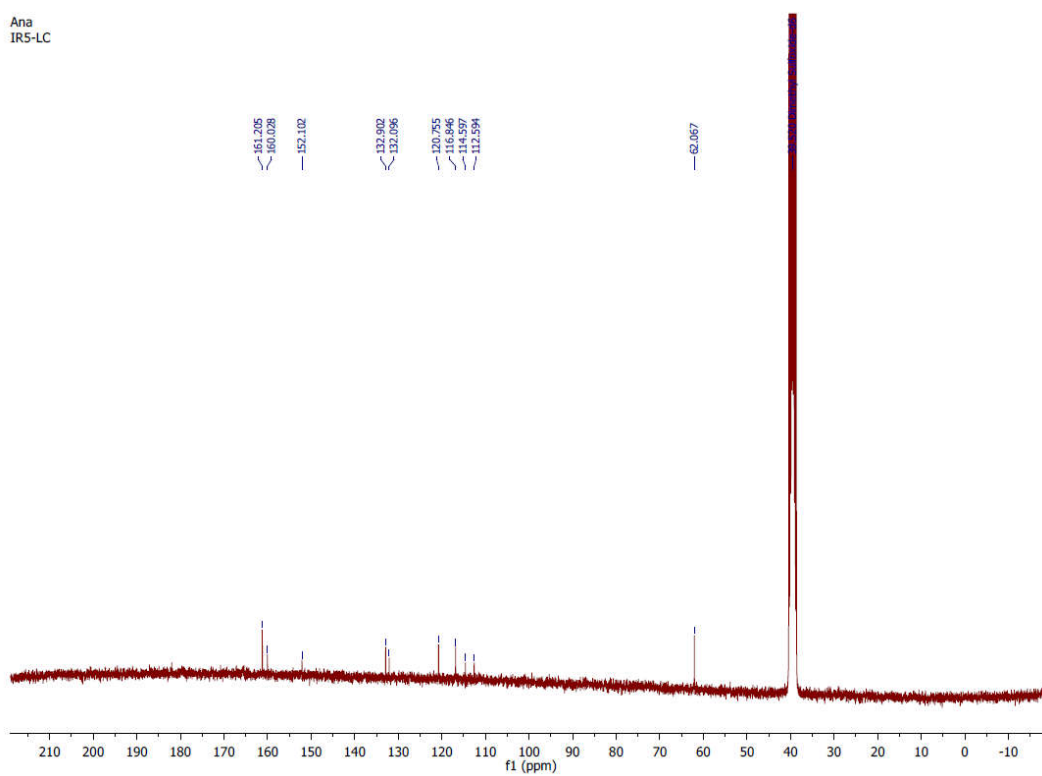

**Figure S8:**  $^{13}\text{C}$  NMR spectrum of 2-chloro-1,3,8-trihydroxy-6-(hydroxymethyl)-anthraquinone (7) (300 MHz, DMSO- $\text{d}_6$ ).

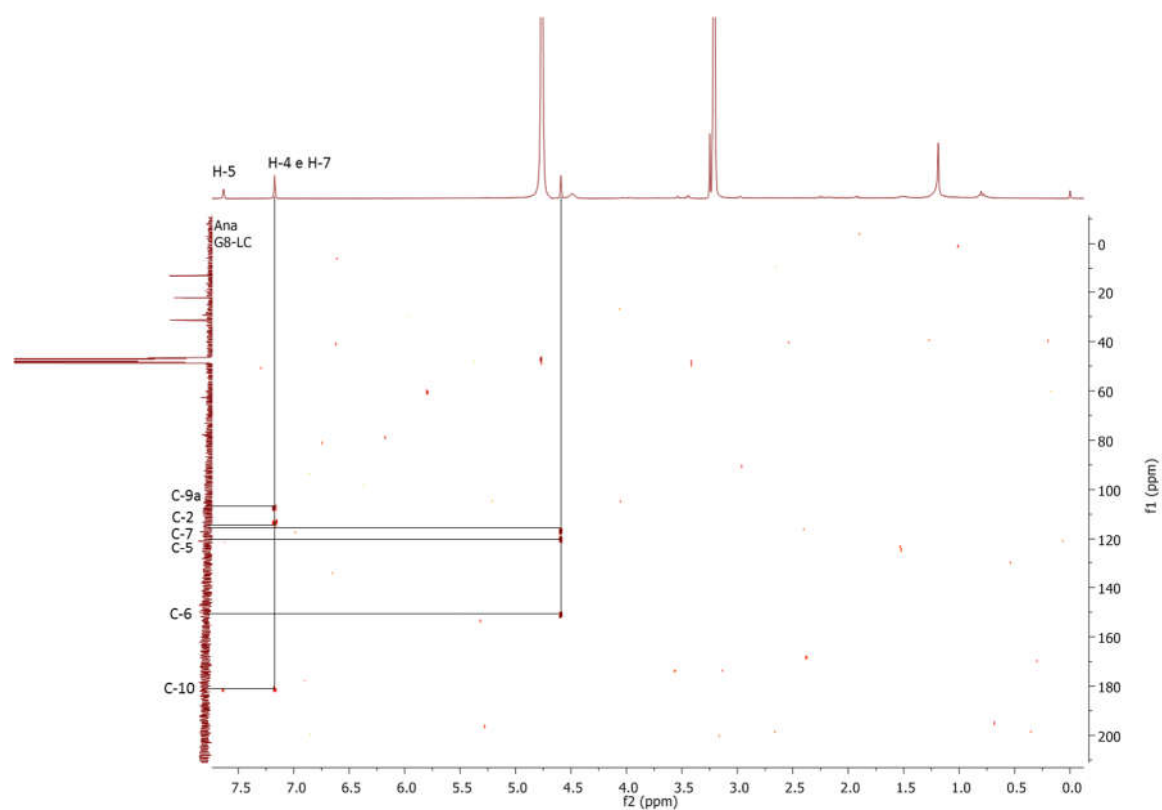

**Figure S9:** HMBC spectrum of 2-chloro-1,3,8-trihydroxy-6-(hydroxymethyl)-anthraquinone (7) (300 MHz, methanol-d<sub>4</sub>).

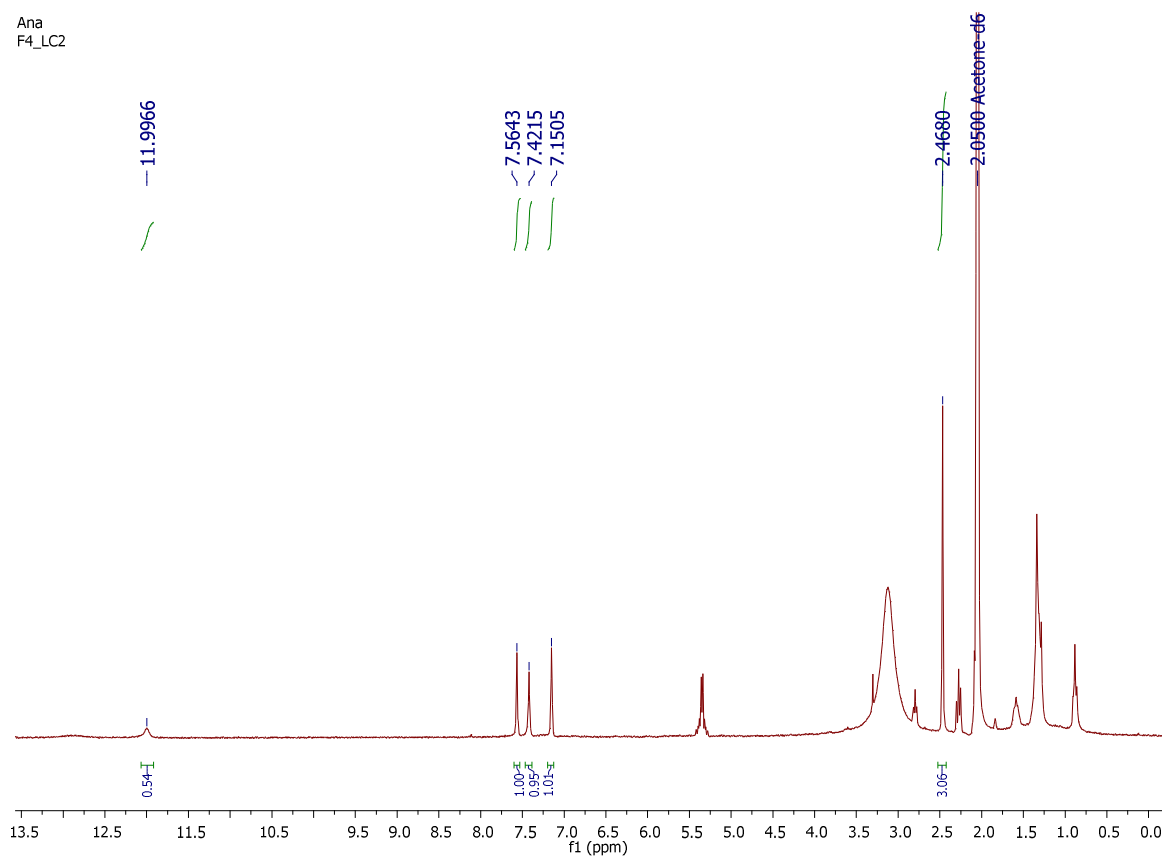

**Figure S10:** <sup>1</sup>H NMR spectrum of 7-chloroemodin (8) (300 MHz, methanol-d<sub>4</sub>)

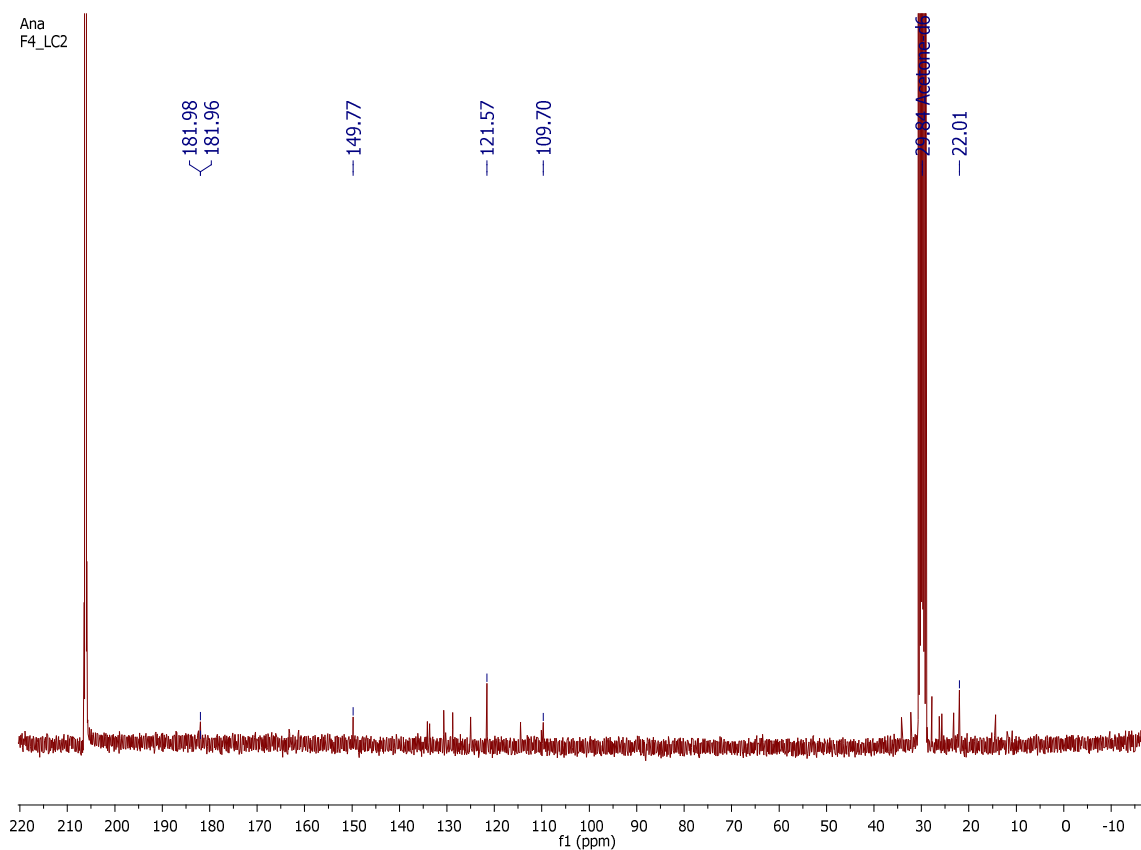

**Figure S11:** <sup>13</sup>C NMR spectrum of 7-chloroemodin (8) (300 MHz, methanol-*d*<sub>4</sub>)

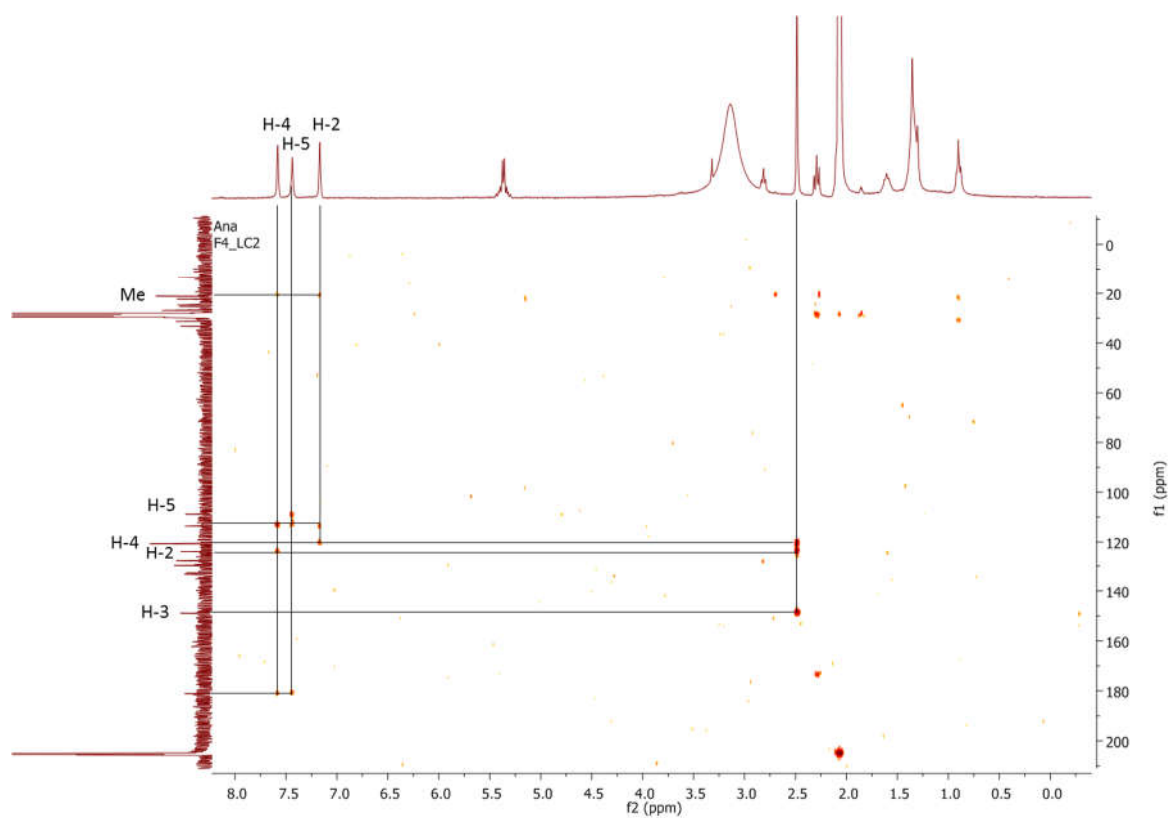

**Figure S12:** HMBC spectrum of 7-chloroemodin (8) (300 MHz, methanol-*d*<sub>4</sub>).

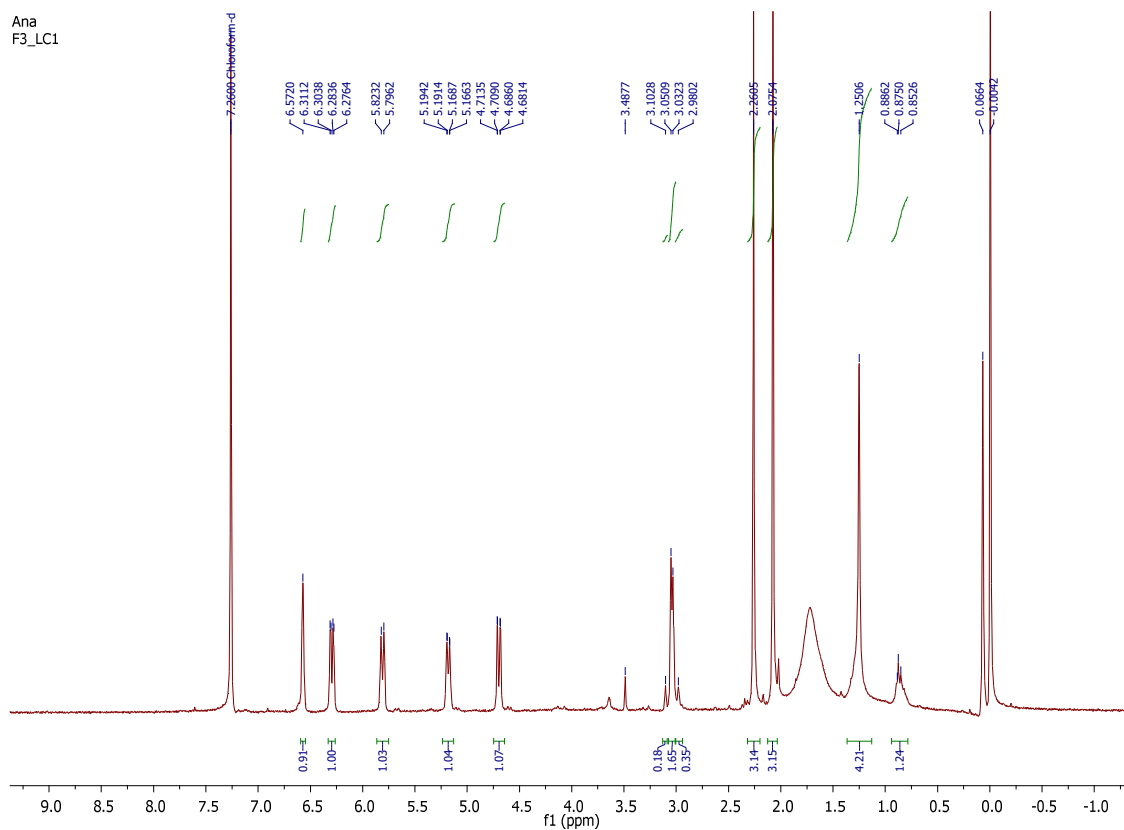

**Figure S13:**  $^1\text{H}$  NMR spectrum of bisdethiobis(methylthio)acetylaranotone (9) (300 MHz,  $\text{CDCl}_3$ )

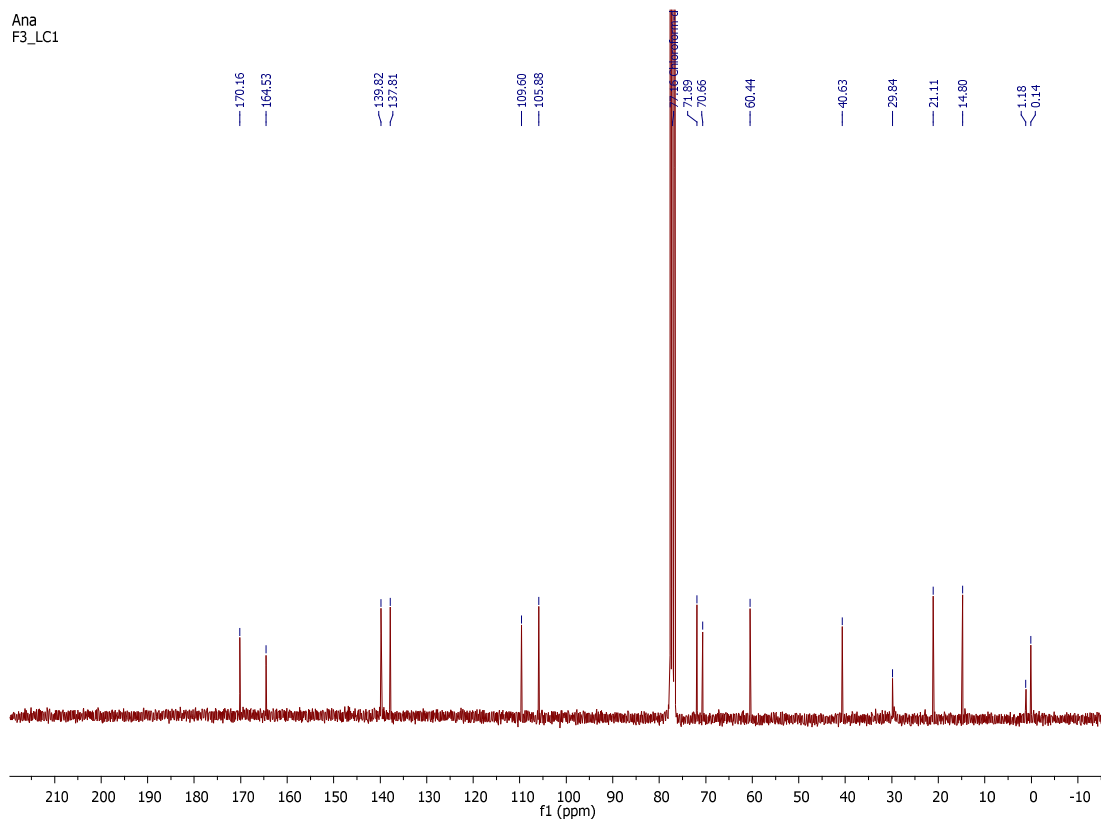

**Figure S24:**  $^{13}\text{C}$  NMR spectrum of bisdethiobis(methylthio)acetylaranotone (9) (75 MHz,  $\text{CDCl}_3$ )

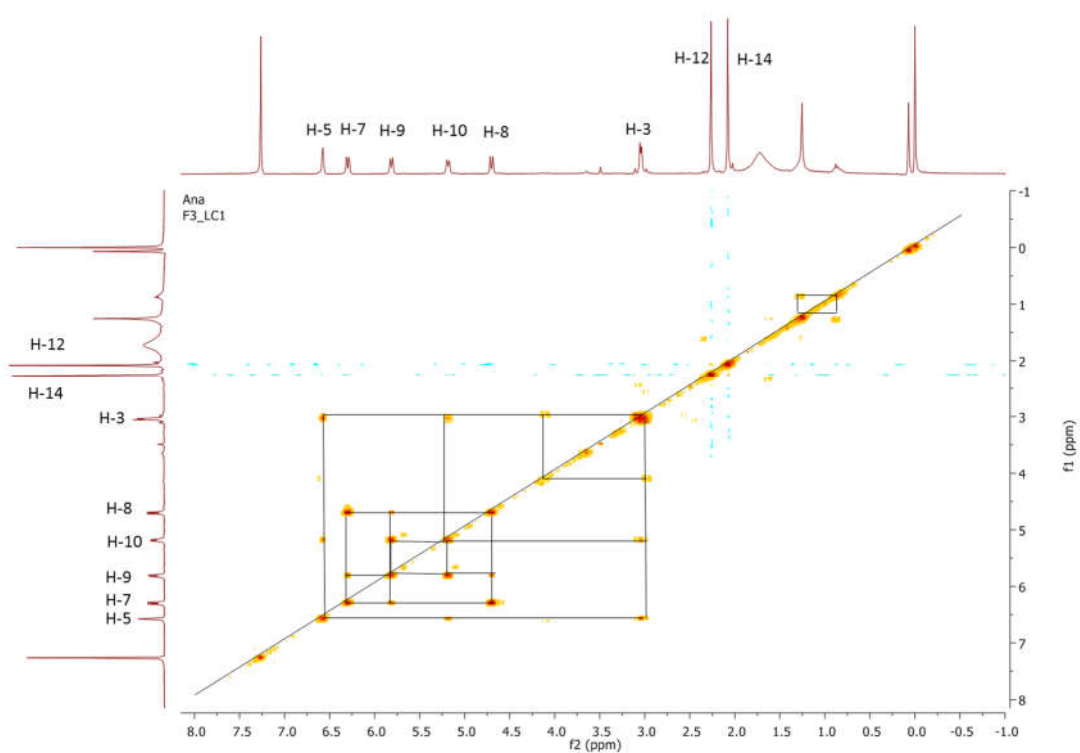

**Figure S15:** COSY spectrum of bisdethiobis(methylthio)acetylaranotine (9) (300 MHz, CDCl<sub>3</sub>)

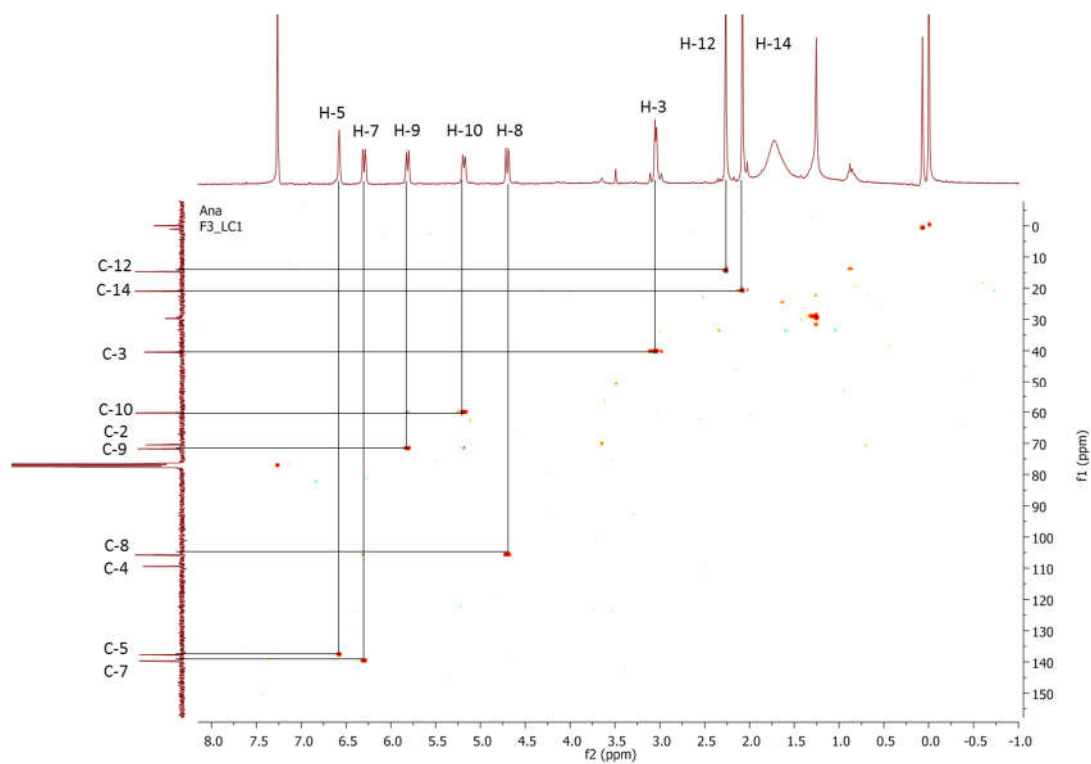

**Figure S16:** HSQC spectrum of bisdethiobis(methylthio)acetylaranotine (9) (300 MHz, CDCl<sub>3</sub>)



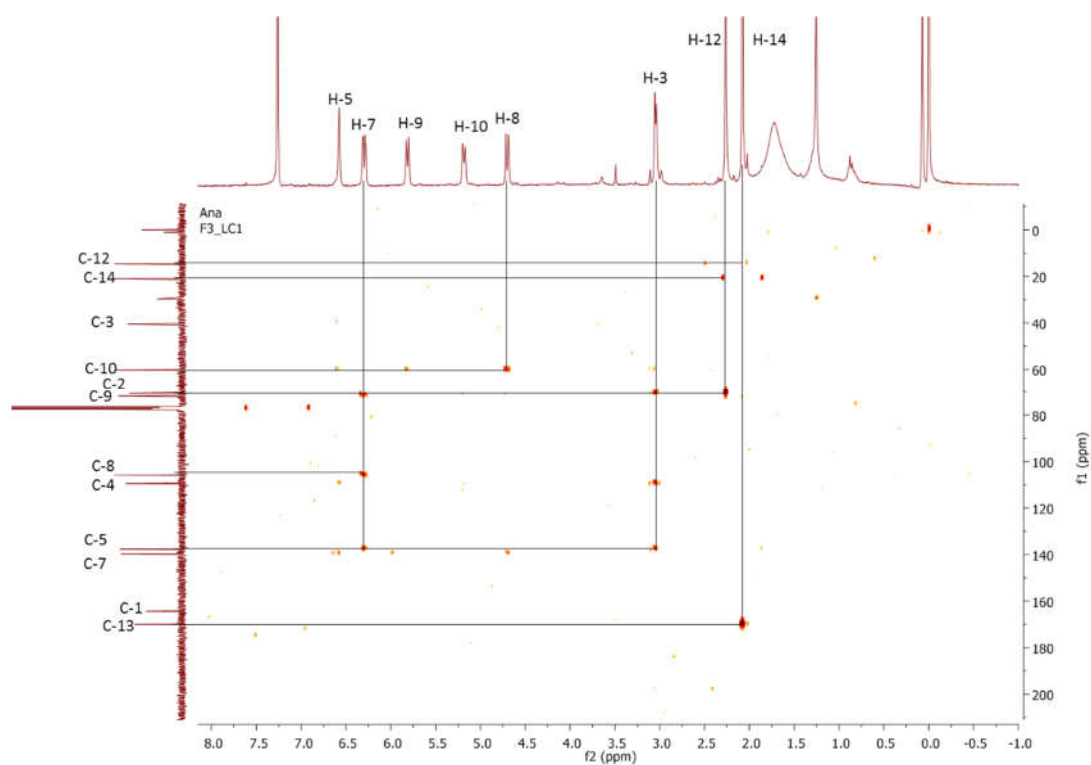

**Figure S17:** HMBC spectrum of bisdethiobis(methylthio)acetylaranotone (9) (300 MHz,  $\text{CDCl}_3$ )

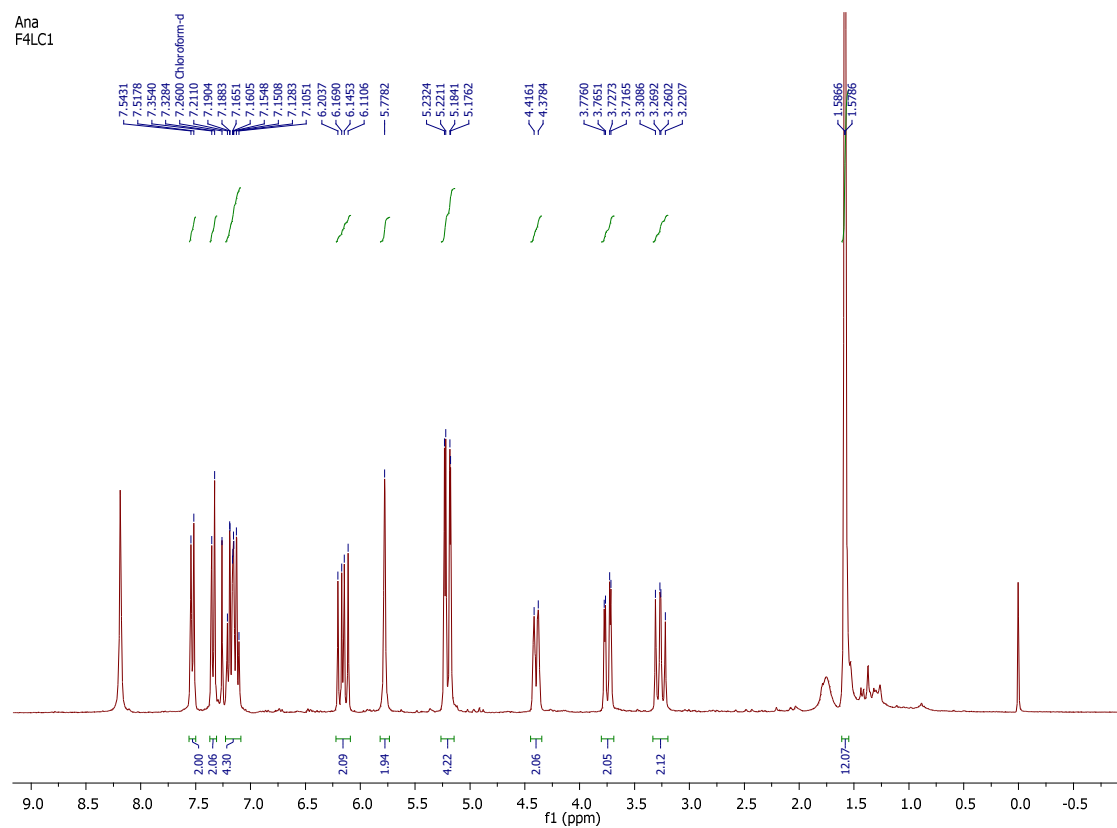

**Figure S18:**  $^1\text{H}$  NMR spectrum of fellutanine C (10) (300 MHz,  $\text{CDCl}_3$ ).

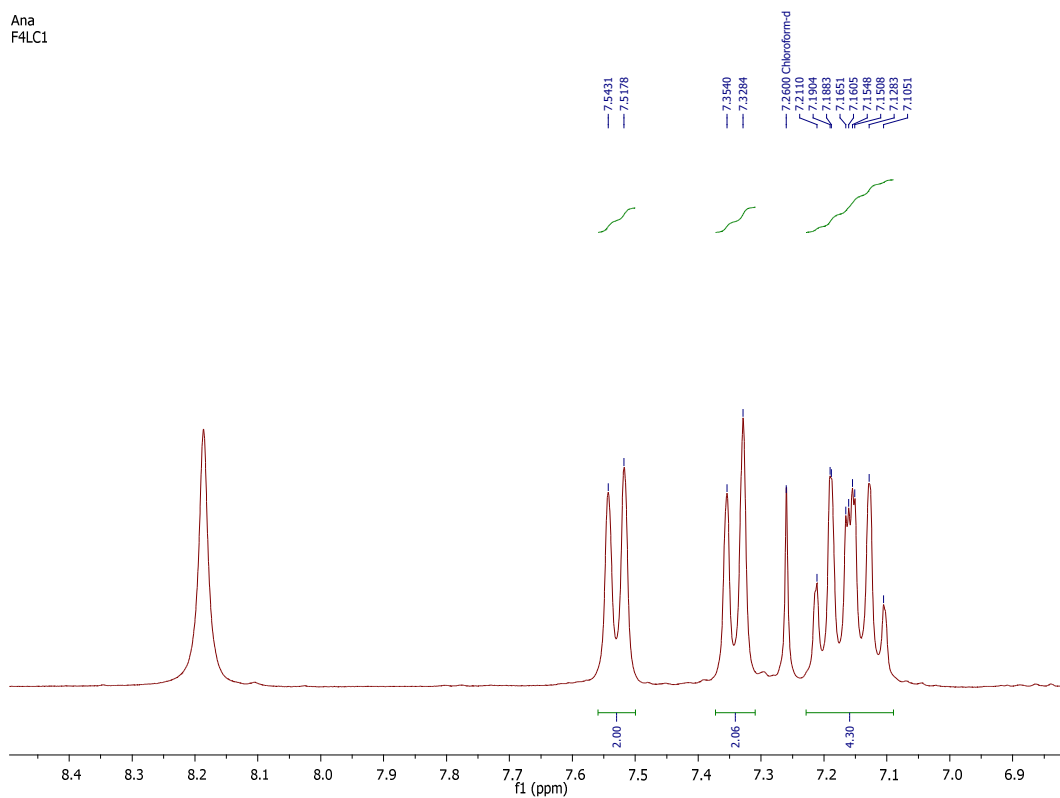

**Figure S19:** Magnified region from the  $^1\text{H}$  NMR spectrum of fellutanine C (10) (300 MHz,  $\text{CDCl}_3$ ).

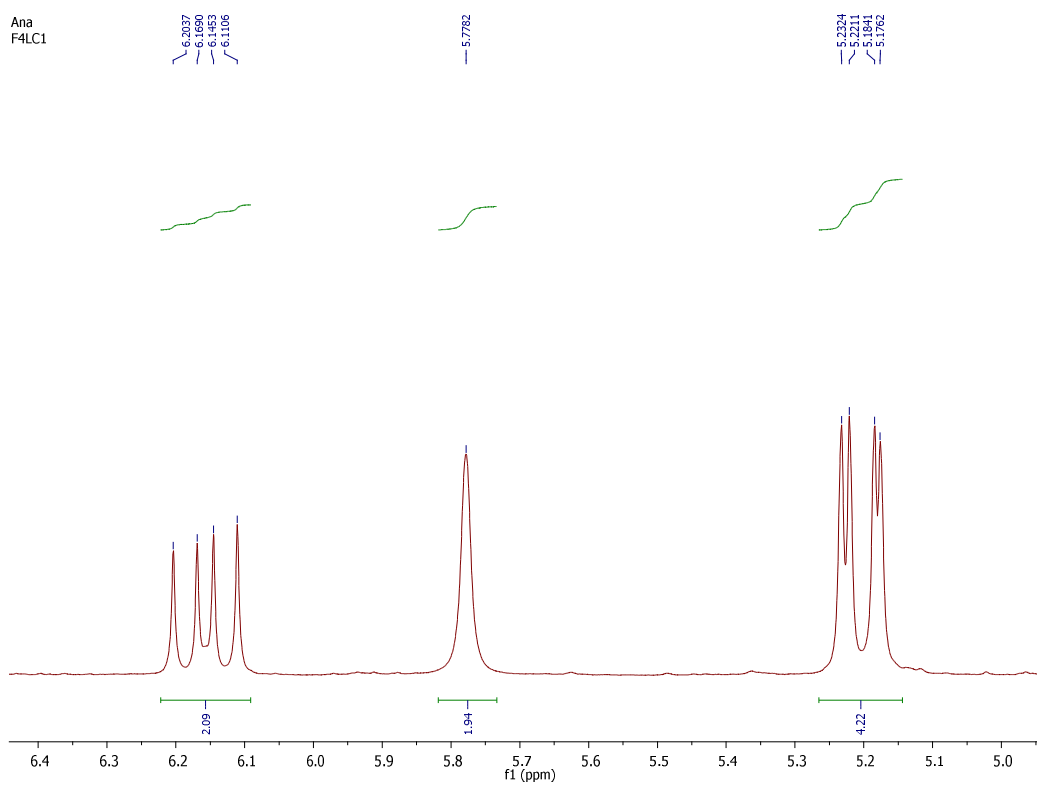

**Figure S20:** Magnified region from the  $^1\text{H}$  NMR spectrum of fellutanine C (10) (300 MHz,  $\text{CDCl}_3$ ).

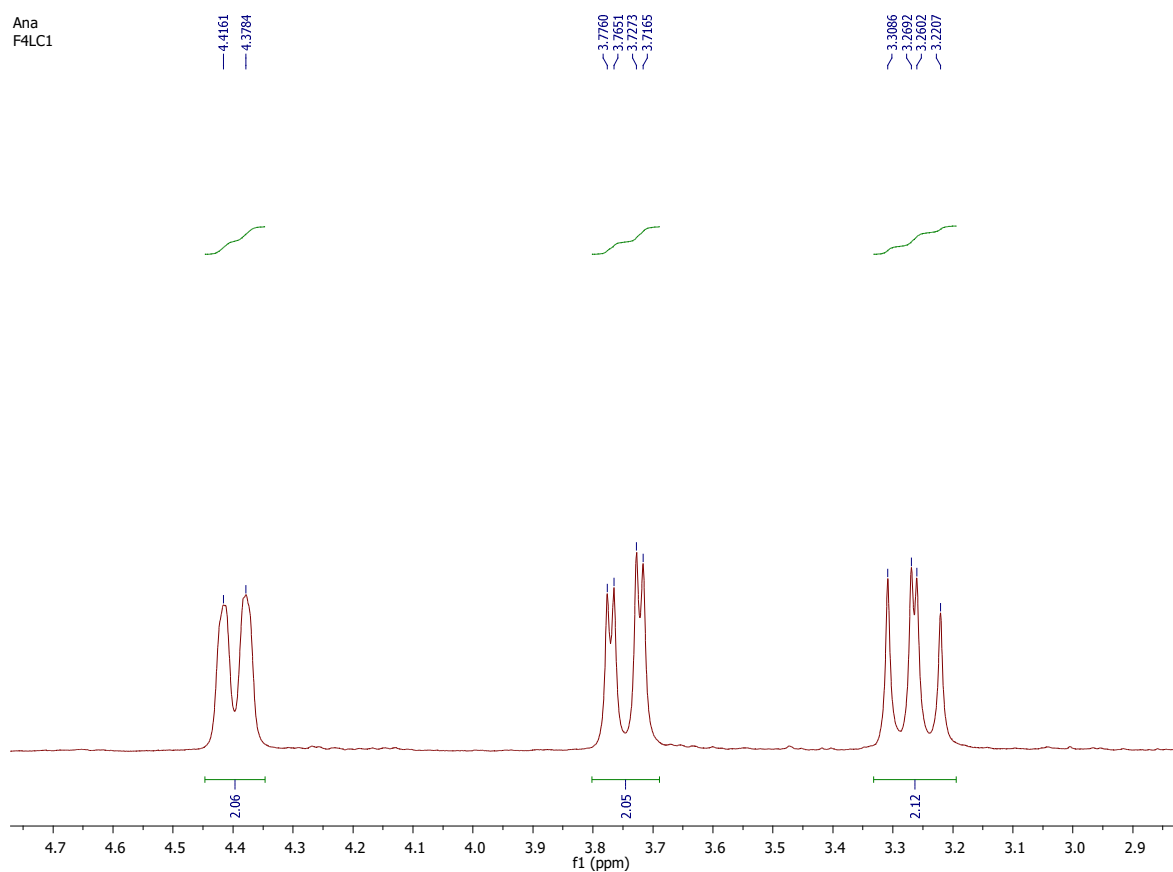

**Figure S21:** Magnified region from the  $^1\text{H}$  NMR spectrum of fellutanine C (10) (300 MHz,  $\text{CDCl}_3$ ).

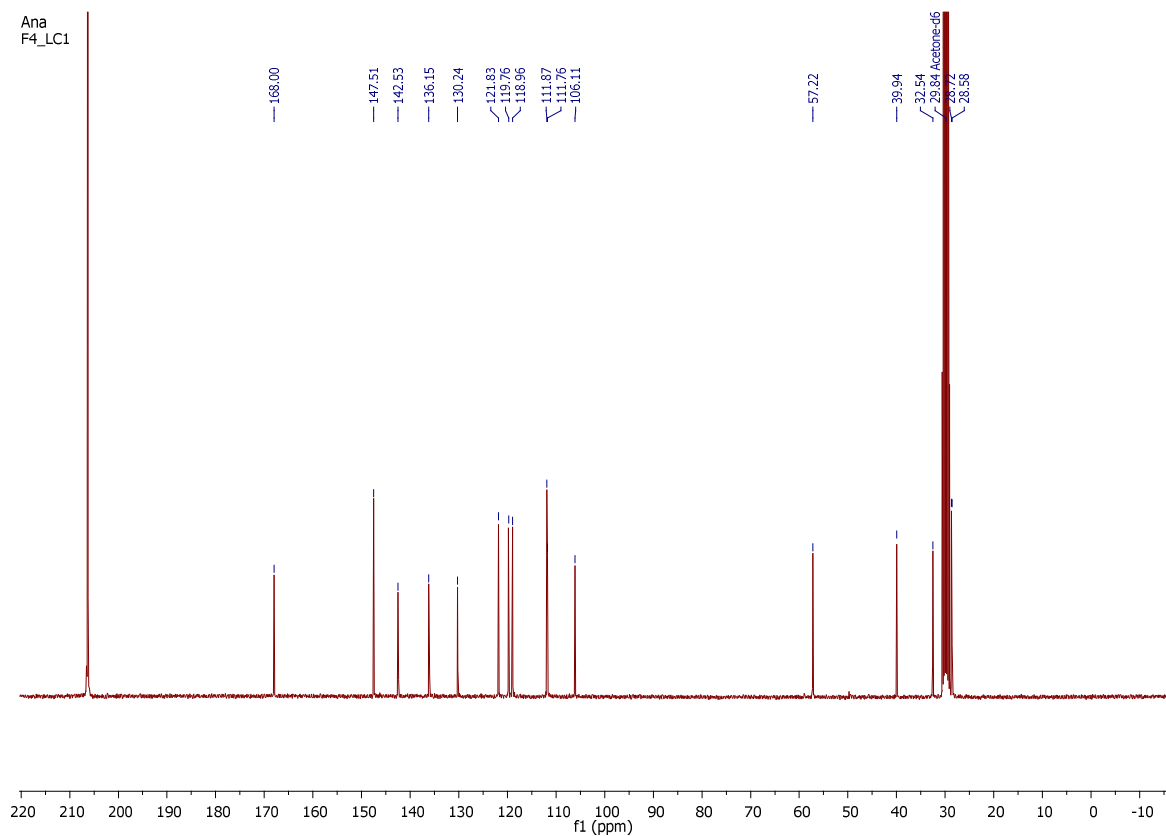

**Figure S22:**  $^{13}\text{C}$  NMR spectrum of fellutanine C (10) (75 MHz,  $\text{CDCl}_3$ ).

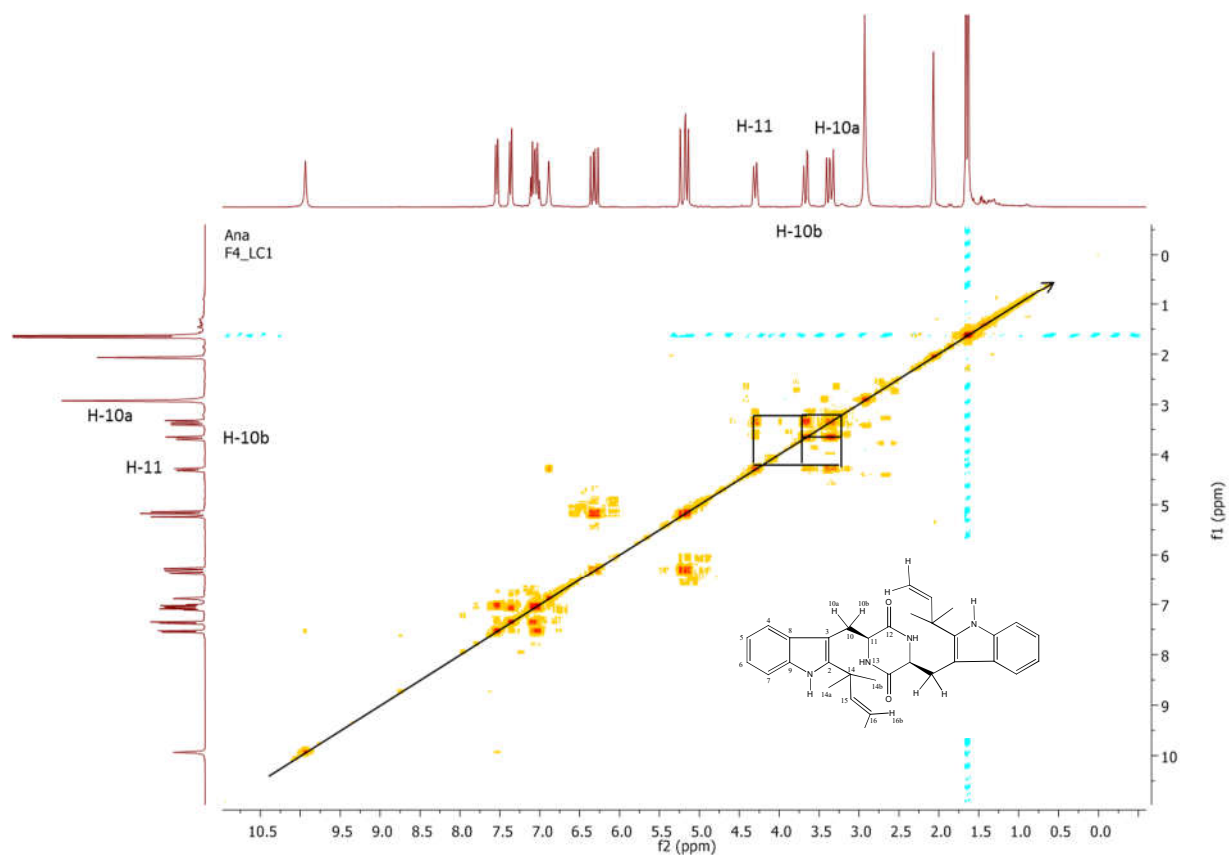

**Figure S23:** COSY spectrum of fellutanine C (10) (acetone-*d*<sub>6</sub>)

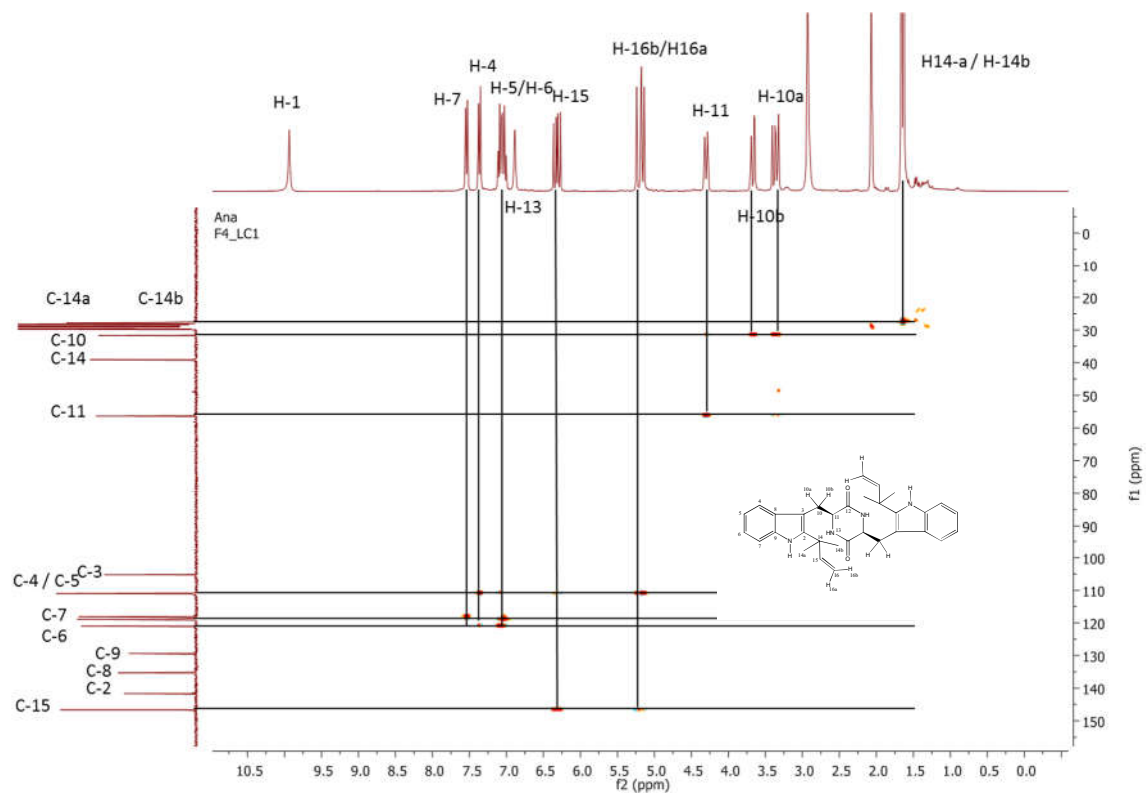

**Figure S24:** HSQC spectrum of fellutanine C (10) (acetone-*d*<sub>6</sub>)

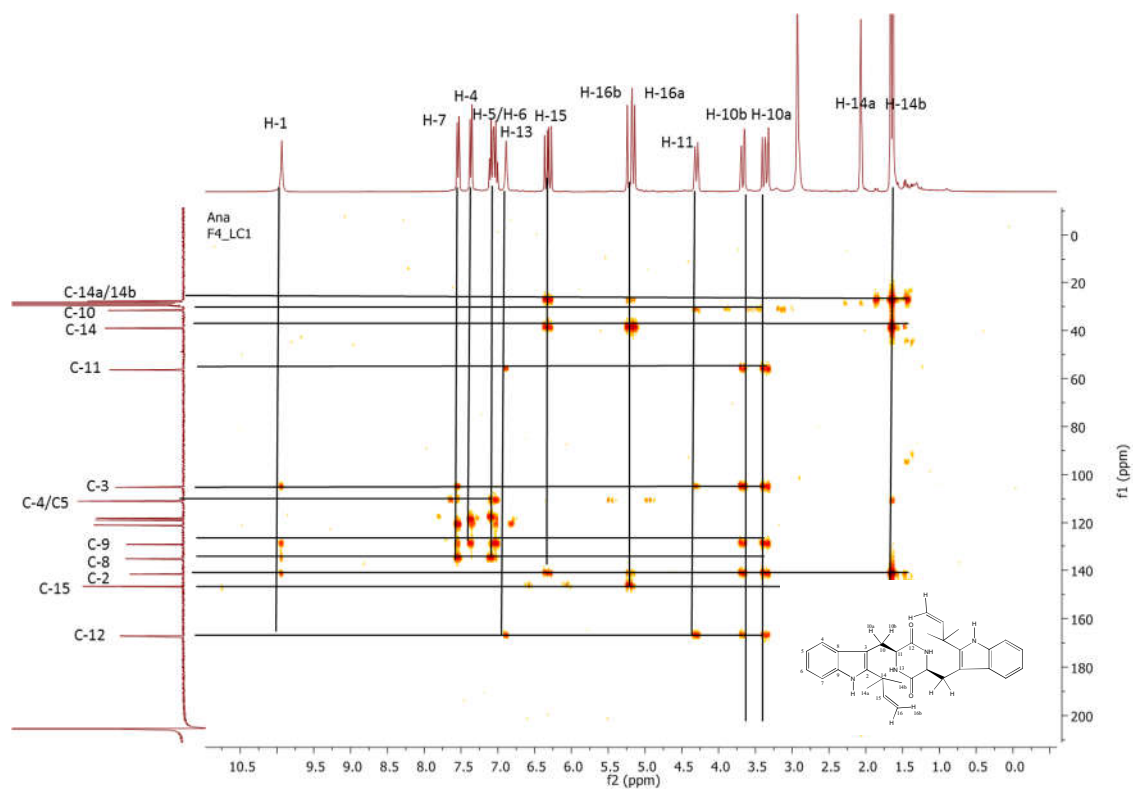

Figure S25: HMBC spectrum of fellutanine C (10) (acetone- $d_6$ )

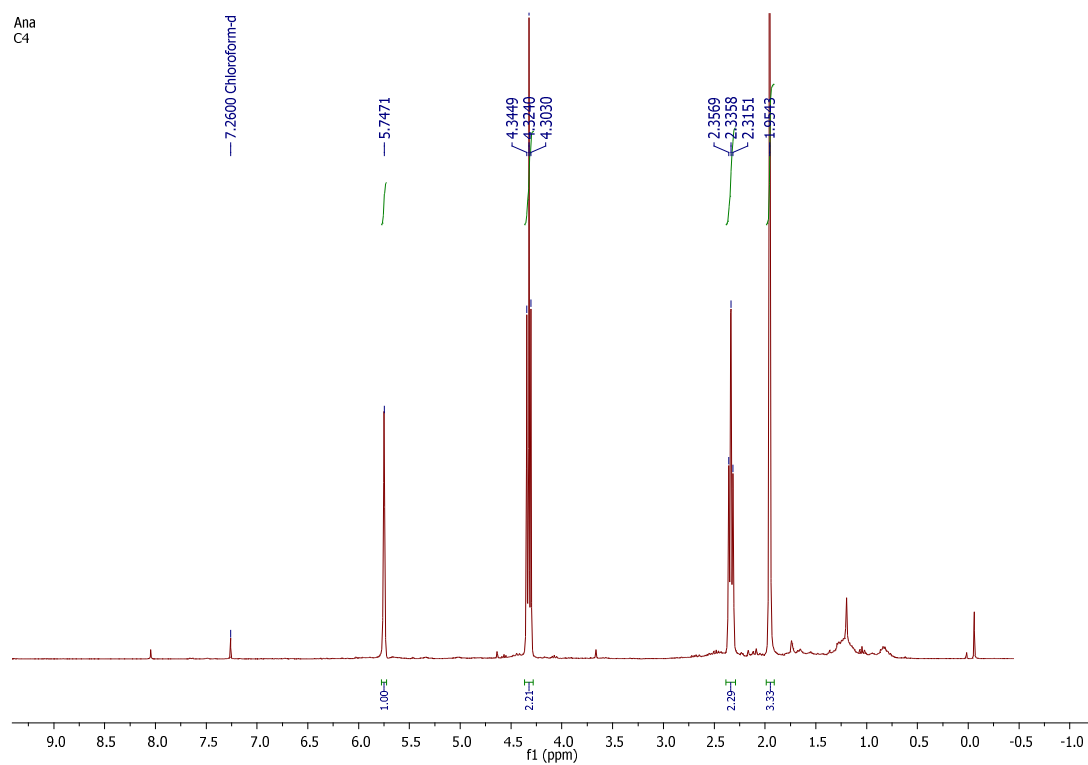

Figure S263:  $^1\text{H}$  NMR spectrum of 4-methyl-5,6-dihydro-2H-pyran-2-one (15) (300 Hz,  $\text{CDCl}_3$ )

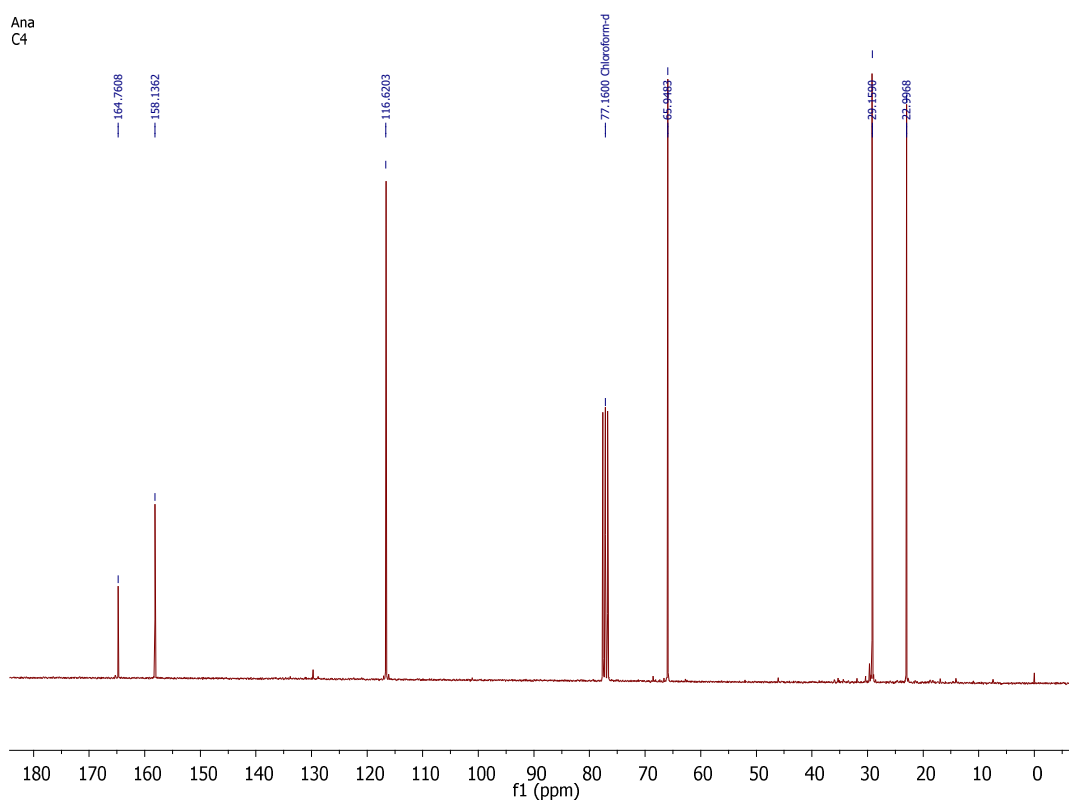

**Figure S274:**  $^{13}\text{C}$  NMR spectrum of 4-methyl-5,6-dihydro-2H-pyran-2-one (15) (75 Hz,  $\text{CDCl}_3$ )

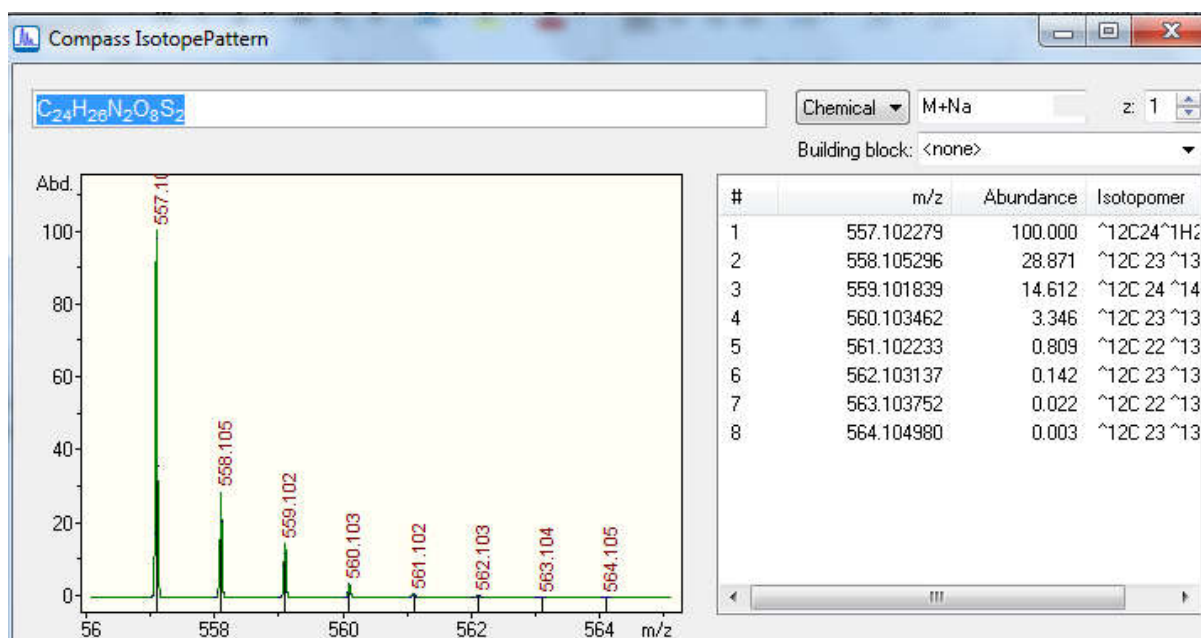

**Figure S28:** Isotope profile simulation for the compound referring to the accurate mass  $m/z$  557.1028 (IsotopePattern – Data Analysis)
